# Supplementary material
Source: PubMed Central journal article supplement (PMC1480448)
Supplement: pnas_0602293103_1.pdf [file pnas_0602293103_1.pdf]

A.thaliana GPT -----  
A.thaliana XPT -----  
A.thaliana PPT1 -----  
A.thaliana PPT2 -----  
A.thaliana TPT -----  
P.falciparum iTPT MNVLRTRLIITIFFNLQIYIGKCLNHDNIKNIKNVPMNFHLKNTNGKIYQKNKRPSQINR  
P.falciparum oTPT -----

A.thaliana GPT -----MVL SVKQT LSP-----KIGLFRRN P SSSLGRS  
A.thaliana XPT -----MISL NLSPS LNPGLLHKTRTCQOPTRLSALLVTNPKPFNHRH  
A.thaliana PPT1 -----MOSSAVFSLSPSLPL-----LKPRRLSLRHH P ITTAASS  
A.thaliana PPT2 -----MFALTFLNPNRPLP-----SPLFLAKST  
A.thaliana TPT -----MESRVLLRATANVVG-----IPKLRPPIGAIHRQFS  
P.falciparum iTPT KNTNKQAFNIPVFSIPNYKPKYNTCTKTKNIAFVNSRINQAHNRNIQVTKAAELNAIKKI  
P.falciparum oTPT -----

A.thaliana GPT PVSLS----FPSTELPKRTVLAVSKPLHLSSSLRAKSPVVRCEAYEADRSEPHPIGDDAA  
A.thaliana XPT PLGLSPIPNLQIRDVSAKPLLSLTNPESSSGFSRKPRSIAAVGSSDSNPDEKSDLG----  
A.thaliana PPT1 SDLNVSPNVVSIPLSRRSWRLASSDSPLRAWSGVPSPIHSLDTRFRRTAATAVPESAE  
A.thaliana PPT2 PES-----ALSRRSRAFSSNS-----YPWRPNLRFNGFKLSATVPENVE  
A.thaliana TPT TASSSSFSVKPIGGIGEGANLISGRQLRPILLDDSSAINGGEKREILKPVKAAAEGGDT  
P.falciparum iTPT KNDKKFTLFNSGNRDNIKTY@HDINKGIIDDISTNNSYSNIGDTSENTYQPNFNNTLT  
P.falciparum oTPT -----MKDNEKKNEYGTFPITINEGYSDNVGDN-----

A.thaliana GPT AAET-KSEAAKK--LKIGIYFATWWALNVVFNINKKVLNAYPYPWLTSTLSLAAGSLMM  
A.thaliana XPT EAGK-KEKAKT--LQLGIVFGLWYFQNIYFNINKKALNVFPYPWLLASFOLFAGSIWM  
A.thaliana PPT1 EGDN-SGKLTKV--LELGLLFAMWYLFNIYFNINKKQVLKALHAPMTVTLVQFAVGSVLI  
A.thaliana PPT2 GGDLESGSLVKG--LKLGGMGVWYLLNIYFNINKKQVLRVYYPATVTAFOGCGTLMI  
A.thaliana TPT AGDAKVGFLAKYYPWLVTFGFFFMWYFLNIFNINKKIYNYFPYPYFVSVIHLFVGVVYC  
P.falciparum iTPT EKKPCTFLNKAVEVGKTVSLLGMWYVCNIFYNINENKKALNINLMPITIAITQIYVGLPIF  
P.falciparum oTPT KLKSKGIYHKLFEKLLKALLFLTWTYTLNVLYNVDNKKALNMVKLPWFISSMOLYVGVWIFI

A.thaliana GPT LISWAVGIVETPKTDF-----DFWKTLPVVAVAHTIGH  
A.thaliana XPT LVLWSFKLYPCPKISK-----PFIALLGPALFHTIGH  
A.thaliana PPT1 TIMWVLNLYKRPKISG-----AQLAAILPLAVVHTLGN  
A.thaliana PPT2 AIMWLLKHLRPRKFSF-----SQFTVIIVQLAVAHTLGN  
A.thaliana TPT LISWSVGLPKRAPIDS-----NLLKVLIPVAVCHALGH  
P.falciparum iTPT LIPWLLKLRNQPFLFYDEQELKRINMSDRNALIKGFQKYVFLKKYSSIMKQSIYHGYAH  
P.falciparum oTPT FIYWIISGMKKIPKIYS-----YDIFIRN--ILIQSVCHIFVH

A.thaliana GPT VAATVSMKVAVSFTHIIKSGEPAFSVLVSRFILGETFPTS VYLSLPIIIGGCALSALTE  
A.thaliana XPT ISACVFSKVAVSFTHVIKSAEPVFSVIFS-SLLGDSYPLAVWLSLPIVMGCSLAAVTE  
A.thaliana PPT1 LFTNMSLGKVSVSFTHTIKAMEPFFSVLLSAMFLGEKPTPWVWGAIPIVGGVALASISE  
A.thaliana PPT2 LLTNVSLGRVNVVSFTHTIKAMEPFFTLLSVLLGEWPSLWIVCSLPIVAGVSLASASTE  
A.thaliana TPT VTSNVSFAAVVSFTHTIKALEPFFNAAASQFIMGQSIPTLWLSLAPVVLGVAMASLSTE  
P.falciparum iTPT LLSVIAMGAGAISFVHIVKASAPLFAAFFSYFFMNNKMSIYTYSSLVPIVFGVSLASIKE  
P.falciparum oTPT FGAVMAMSATSVSFTHVVKACEPVFTAIFSIILLKOYLKINKYIALLIIVGGVVCASMKE

A.thaliana GPT LNFNMIGFMGAMISNLA FVFRNIFSKK-GMKG----KSVSGMNYACLSMLSLILITP-  
A.thaliana XPT VSFNLGGLSGAMISNVGFVLRNIYSKR-SLOSF----KEIDGLNLYGCISLISLLYLFP-  
A.thaliana PPT1 VSFNWAGFSSAMASNLTNQRNVL SKKVMVKD----DSLDNITLFSIITLMSLVLMAP-  
A.thaliana PPT2 ASFNWIGFCSAMASNVTNQRNVL SKKFMVGKD----ALDNINLFSIITIIISFILLVP-  
A.thaliana TPT LSFNWLGFISAMISNISFTYRSIFS KK----AM----TDMSTNVYAYISIIALFVCIP-  
P.falciparum iTPT LSFTYKALYSTLSANVLSTMRATEAKIMMGKNLDKLRNLT PENIFALLTSSAIFLTPA  
P.falciparum oTPT LHFTWIAFWCATLSNFGSSIRS IYAKKMMTQKS-LIGENLNASNIYAFITIIISALISLP-

A.thaliana GPT FAIAVEGPQMVDGWQTALATVG--PQFVWVVAQSVFYHLYNQVS YMSLDQISPLTFSV  
A.thaliana XPT VAIFVEG-SHWVPGYHKAIASVGTPTSTFYFWVLLSGV FYHLYNQSSYQALDEISPLTFSV  
A.thaliana PPT1 VTFTEGIFKFTPSYIQSA---GVNVKQIYTKSLIAALCFHAYQOVSYMILARVSPVTHSV  
A.thaliana PPT2 LAAILIDGFKVTPSHLQVATSQGLSVKEFCIMSLLAGVCLHSYQOVSYMILEMVPVTHSV  
A.thaliana TPT PAIIVEGPKLLNHGFADAIKVG-MTKFISDLFWVGMFYHLYNQLATNTLERVAPLTHAV  
P.falciparum iTPT LYIDSHKWKDAYEYLMNNK---NVLKQVLRHVLMSGVWFYLYNQLSFISLNRNLNHITHAV  
P.falciparum oTPT -LVLAFEQKETYNFLVNYOGTNYTFKQDVI FKIIILSGMWVYFNNEVAFMCLERVNOITHAL

A.thaliana GPT GNTMKRISVIIVSSIIIFRTPVQPVNALGAAIALGTFLYSQAOKL-----  
A.thaliana XPT GNTMKRVVVIISTVLVFRNPVRPLNALGSAIAIFGTFLYSQAATAKKKKIEVGGDKKN  
A.thaliana PPT1 GNCVKRVVVIIVSSVIFFKTPVSPVNAFGTGIALAGVFLYSRVK--GIKPKPKTA---  
A.thaliana PPT2 GNCVKRVVVIIVSSILFFKTPVSPVNSIGTATALAGVYLYSRAKRVQVKNPKMS---  
A.thaliana TPT GNVLKR V FVIFGFSIIVIFGNKISTQTGTGIAIAGVAMYSI IKAKIEEKRQKKA-  
P.falciparum iTPT ASTVKRVFLILTSYFIFGTFKFSFLGGLGSSIAVGGTFVYSLVKKKFG-----  
P.falciparum oTPT ANS I KR V V I I V S S I I I F K T O I T L L G A I G S A V A I F G A F L Y S I F -----
